# Supplementary material for: SARS-CoV-2 vaccination responses in untreated, conventionally treated and anticytokine-treated patients with immune-mediated inflammatory diseases
Source: HighWire-hosted journal article supplement (doi:10.1136/annrheumdis-2021-220461), 2021-05-06
Supplement: annrheumdis-2021-220461supp001_data_supplement.pdf [file annrheumdis-2021-220461supp001_data_supplement.pdf]

**Supplementary Table 1. Regression model summary.**

| Term              | Coefficient (95%CI)    | P      |
|-------------------|------------------------|--------|
| (Intercept)       | 4.03 (1.49 to 6.57)    | 0.002  |
| IMID vs. Controls | -1.53 (-2.14 to -0.93) | <0.001 |
| Age               | -0.05 (-0.07 to -0.04) | <0.001 |
| Male vs. female   | 0.63 (0.12 to 1.14)    | 0.016  |
| Time-spline-1     | 0.25 (0.17 to 0.33)    | <0.001 |
| Time-spline-2     | -0.25 (-0.35 to -0.16) | <0.001 |

**Supplementary Table 2. Pairwise group/subgroup comparisons.**

| Comparison                   | Marginal mean difference* (95%CI) | P      |
|------------------------------|-----------------------------------|--------|
| Healthy controls - IMIDs     | 1.58 (0.98 to 2.19)               | <0.001 |
| (b/tsDMARD) - (csDMARD)      | 0.23 (-0.83 to 1.30)              | 0.974  |
| (b/tsDMARD) - Controls       | -1.58 (-2.37 to -0.79)            | <0.001 |
| (b/tsDMARD) - Untreated      | -0.22 (-1.28 to 0.83)             | 0.976  |
| (csDMARD) - Controls         | -1.81 (-2.73 to -0.89)            | <0.001 |
| (csDMARD) - Untreated        | -0.46 (-1.61 to 0.70)             | 0.866  |
| Healthy controls - Untreated | 1.35 (0.43 to 2.28)               | 0.022  |

\*Adjusted for age, sex, time elapsed from first vaccination date to sampling date. CI, confidence intervals; IMIDs, immune-mediated inflammatory diseases, b/tsDMARDs, biologic or targeted synthetic disease modifying anti-rheumatic drugs; csDMARDs, conventional synthetic disease modifying anti-rheumatic drugs.

**Supplementary Table 3. Empirical mean ODs by type of treatment.**

| Treatment Group | OD Mean (SD) |
|-----------------|--------------|
| IMIDs-csDMARD   | 6.26 (3.00)  |
| IMIDs-IL-23i    | 7.89 (1.42)  |
| IMIDs-IL-17i    | 4.75 (2.61)  |

---

|                        |             |
|------------------------|-------------|
| IMIDs-IL-6i            | 7.15 (1.08) |
| IMIDs-JAKi             | 4.88 (3.31) |
| IMIDs-Other Treatments | 4.42 (5.22) |
| IMIDs-TNFi             | 8.04 (2.51) |
| IMIDs-Untreated        | 6.64 (3.70) |
| Controls               | 9.36 (1.85) |

---

csDMARDs, conventional synthetic disease modifying anti-rheumatic drugs; IMIDs, immune-mediated inflammatory diseases, IL, interleukin; JAK, Janus kinase, TNF, tumor necrosis factor.

**Supplementary Table 4. Safety in IMID patients and controls after first and second vaccination**

| N                          | IMIDs             |                    | Controls          |                    |
|----------------------------|-------------------|--------------------|-------------------|--------------------|
|                            | 70*               |                    | 164 <sup>+</sup>  |                    |
|                            | First Vaccination | Second Vaccination | First Vaccination | Second Vaccination |
| Injection side pain, N (%) | 32 (45.7)         | 32 (45.7)          | 129 (78.7)        | 106 (78.7)         |
| Local reddening, N (%)     | 3 (4.3)           | 3 (4.3)            | 6 (3.7)           | 8 (4.9)            |
| Local swelling, N (%)      | 5 (7.1)           | 3 (4.3)            | 20 (12.2)         | 24 (14.6)          |
| Fatigue, N (%)             | 14 (20.0)         | 21 (30.0)          | 48 (29.3)         | 81 (49.4)          |
| Headache, N (%)            | 7 (10.0)          | 19 (27.1)          | 37 (22.6)         | 56 (34.2)          |
| Fever >38°C, N (%)         | 1 (1.4)           | 7 (10.0)           | 2 (1.2)           | 16 (9.8)           |
| Lymphadenopathy, N (%)     | 2 (2.9)           | 3 (4.3)            | 4 (2.4)           | 13 (7.9)           |
| Chills, N (%)              | 2 (2.9)           | 5 (7.1)            | 7 (7.9)           | 31 (18.9)          |
| Arthralgia, N (%)          | 5 (7.1)           | 11 (11.4)          | 8 (4.9)           | 33 (20.1)          |
| Myalgia, N (%)             | 6 (8.6)           | 10 (14.3)          | 17 (10.4)         | 42 (25.6)          |
| Nausea/vomiting, N (%)     | 0                 | 4 (5.7)            | 4 (2.4)           | 6 (3.7)            |
| Diarrhea, N (%)            | 0                 | 2 (2.9)            | 0                 | 3 (1.8)            |
| Neurologic, N (%)          | 2 (2.9)           | 1 (1.4)            | 0                 | 2 (1.2)            |
| Other side effects, N (%)  | 8 (11.4)          | 9 (12.9)           | 5 (3.1)           | 11 (6.7)           |

IMIDs, immune-mediated inflammatory diseases. \*safety data were from 70 out of 84 IMID patients, <sup>+</sup> safety data were from 164 out of 182 controls
